# Supplementary material
Source: PubMed Central journal article supplement (PMC3384168)
Supplement: 1202435109_pnas.201202435SI.pdf [file 1202435109_pnas.201202435SI.pdf]

# Supporting Information

Cheng et al. 10.1073/pnas.1202435109

## SI Materials and Methods

**Metabolic Characterization of APPL1 Transgenic (Tg) and Knockout Mice (KO).** The mice were fed either with a standard chow (STC) (Purina) with 20 kcal percentage of protein, 10 kcal percentage of fat, and 70 kcal percentage of combined simple carbohydrates or with a high-fat diet (HFD) (Research Diets) composed of 20 kcal percentage of protein, 45 kcal percentage of fat, and 35 kcal percentage of carbohydrates. Glucose tolerance test (GTT) was performed as described previously (1) in overnight-fasted mice after i.p. injection of D-glucose (2 g/kg). For insulin tolerance test (ITT), mice fasted for 6 h were intraperitoneally injected with human recombinant insulin (Novo Nordisk). To evaluate insulin secretion in vivo, overnight-fasted mice were intraperitoneally injected with 2 g/kg D-glucose or 1 g/kg L-arginine. Blood samples were taken from the tail vein for the measurement of glucose and insulin levels using a glucose meter and insulin ELISA kits (Antibody and Immunoassay Services, The University of Hong Kong), respectively.

**Quantitative Real-Time PCR.** Total RNA was extracted from isolated islets or INS-1E cells using TRIzol reagent (Invitrogen), and cDNA was synthesized from 0.5  $\mu$ g total RNA by reverse transcription using an ImProm-II reverse transcription kit (Promega) with random hexamer primers. Quantitative real-time PCR was performed using SYBR Green QPCR system (Qiagen) with specific primers (Table S2). The PCR reactions were performed using an Applied Biosystems Prism 7000 sequence detection system. The level of target gene expression was normalized against the GAPDH gene.

**Adenovirus Infection.** Adenovirus encoding APPL1, luciferase control, scrambled control RNAi, and APPL1 RNAi were generated and purified as previously described (1). Adenovirus expressing the constitutively active form of Akt was a kind gift from Christopher J. Rhodes (University of Washington) (2). Isolated islets with similar size were selected and cultured overnight for adenovirus infection. Approximately 100 islets were infected with the adenovirus for 3 h at 37 °C at 100 multiplicity of infection (MOI), assuming 1,000 cells per islet on average, followed by incubation with the fresh medium for 36 h. INS-1E cells were infected with the adenovirus at 50 MOI and cultured as above.

**Coimmunoprecipitation.** INS-1E cells were infected with adenovirus encoding APPL1 RNAi or scrambled control for 40 h, followed by serum starvation for 6 h, and treated with insulin (50 nM) for 10 min. The cells were lysed in a mammalian cell lysis buffer [20 mM Tris-HCl, 150 mM NaCl, 1 mM Na<sub>2</sub>EDTA, 1 mM EGTA, 1% Triton, 1 mM NaF, 1 mM Na<sub>3</sub>VO<sub>4</sub> and protease inhibitor mixture (Roche), pH 7.4]. The total cell lysate was clarified by centrifugation at 20,000  $\times$  g for 15 min at 4 °C. Protein concentration was determined with BCA protein assay (Pierce Biotechnology). Five hundred micrograms of total protein was precleared by incubation with protein G agarose (Sigma) for 1 h at 4 °C. The precleared lysate was incubated with 2.5  $\mu$ g of anti-Akt antibody at 4 °C overnight, followed by incubation with 10  $\mu$ L protein G agarose for 1 h. The immunoprecipitated complex was eluted by boiling with 2 $\times$  SDS/PAGE loading buffer at 99 °C for 5 min. The eluted samples were subjected to Western blot analysis.

**Islet Isolation and Insulin Secretion Assay.** Mice were fasted for 4 h and killed by cervical dislocation. Pancreas was perfused with

collagenase P and subsequently digested at 37 °C for 20 min and then filtered through 500- $\mu$ m and 70- $\mu$ m cell strainers, resulting in two fractions: flow-through fraction containing exocrine cells (nonislet fraction) and captured fraction (islets). Captured islets were then picked manually under a microscope and maintained in RPMI 1640 culture medium supplemented with 10% (vol/vol) FBS at 37 °C overnight. The isolated islets or pancreatic  $\beta$  cells were washed twice with Krebs Ringer bicarbonate (KRB) buffer containing 0.1% fatty acid-free BSA supplemented with 3 mM glucose for 1 h, followed by stimulation with different stimulants for various time periods. For perfusion experiment, the isolated islets were incubated in KRB buffer for 30 min and perfused in KRB buffer containing 3 mM glucose for 6 min, and the perfusate was then switched to KRB buffer containing various concentrations of glucose. Eluted fractions were collected at 3-min intervals for 36 min. Insulin secreted in each fraction was measured using an insulin ELISA kit (Antibody and Immunoassay Services, The University of Hong Kong), and normalized for the number of islets or total amount of protein.

**Histological, Immunohistochemical, and Electron Microscopic Analysis.** Pancreases were isolated from mice, fixed in 4% paraformaldehyde in 0.1 M phosphate buffer, embedded in paraffin, and cut into 5- $\mu$ m thick sections at 50- $\mu$ m intervals. To determine the distribution of APPL1 in pancreas, pancreas sections of lean mice, diet-induced obese mice, and db/db diabetic mice were stained with rabbit anti-APPL1 (3) and mouse antiinsulin (HyTest) antibodies, followed by staining with secondary FITC-antirabbit IgG- and Cy3-antimouse IgG-conjugated antibodies, respectively. The pancreas section from APPL1 KO was used as a negative control. For the measurement of  $\beta$ -cell mass, pancreatic sections were stained with antiinsulin antibody, and the areas of  $\beta$  cells were quantified using an image analysis software (ImageJ 1.43U). The  $\beta$ -cell mass was evaluated by multiplying the pancreas weight by the percentage of  $\beta$  cells as described (4).

Electron microscopic analysis was performed by the Electron Microscope Unit at The University of Hong Kong. Briefly, isolated islets were fixed in 2.5% glutaraldehyde in cacodylate, osmicated in 1% osmium tetroxide, dehydrated and infiltrated, and polymerized in epoxy resin. Sections of 100-nm thickness were prepared from the embedded samples. The thin sections were mounted on 150 mesh hexagonal copper grids, stained with 2% aqueous uranyl acetate and Reynold's lead citrate, and visualized on a Philips EM208s transmission electron microscope. Docked insulin granules were quantified as described previously (5).

**Measurement of ATP Production and Calcium Influx.** ATP level in the islets was measured with Luminescence ATP detection assay system (PerkinElmer). For calcium measurement, Fura-2 calcium indicator (molecular probe) was loaded onto isolated islet at 37 °C for 30 min, followed by washing with KRB buffer. Ratio of 340/380 was monitored using a calcium ion sensing system according to the manufacturer's instructions (IonOptix).

**Two-Photon Excitation Imaging.** The fusion pore dynamics and exocytosis of insulin granules in pancreatic islets were examined using two-photon excitation imaging as described (6). Briefly, pancreatic islets isolated from either 16-wk-old male APPL1 KO mice or WT controls were immersed in a solution containing 140 mM NaCl, 5 mM KCl, 2 mM CaCl<sub>2</sub>, 1 mM MgCl<sub>2</sub>, 10 mM Hepes (pH 7.4), and 3 mM glucose. The polar red fluorescent tracer sulforhodamine B (SRB; 0.7 mM) and/or 10-kDa fluores-







**Table S1. Metabolic characterization of APPL1 KO and APPL1 transgenic mice**

| 20-wk-old male APPL1 KO and WT mice | STC          |               | HFD           |               |
|-------------------------------------|--------------|---------------|---------------|---------------|
|                                     | WT           | APPL1 KO      | WT            | APPL1 KO      |
| Fasting glucose, mmol/L             | 3.3 ± 0.15   | 4.1 ± 0.30*   | 4.9 ± 0.40    | 6.0 ± 0.28*   |
| Fasting insulin, ng/mL              | 0.25 ± 0.06  | 0.57 ± 0.079* | 0.57 ± 0.069  | 1.035 ± 0.15* |
| Food intake, kcal/d                 | 14.94 ± 0.33 | 14.97 ± 0.59  | 15.15 ± 0.39  | 14.94 ± 0.73  |
| 20-wk-old male APPL1 Tg and WT mice | WT           | APPL1 Tg      | WT            | APPL1 Tg      |
| Fasting glucose, mmol/L             | 4.3 ± 0.10   | 4.3 ± 0.14    | 6.48 ± 0.40   | 5.5 ± 0.18*   |
| Fasting insulin, ng/mL              | 0.15 ± 0.03  | 0.12 ± 0.02   | 0.96 ± 0.0.18 | 0.36 ± 0.061* |
| Food intake, kcal/d                 | 13.48 ± 0.77 | 13.26 ± 0.26  | 14.62 ± 0.69  | 15.01 ± 1.20  |
| Body weight, g                      | 30.78 ± 0.38 | 29.61 ± 1.26  | 39.16 ± 1.78  | 41.56 ± 2.66  |

\**P* < 0.05 versus WT control (*n* = 8 each group). HFD, high-fat diet; STC, standard chow.

**Table S2. Primer sequences used for real-time PCR analysis**

| Genes  | Primer sequences            |                             |
|--------|-----------------------------|-----------------------------|
|        | Forward                     | Reverse                     |
| INS2   | 5' TGGAGGCTCTCTACCTGGTG 3'  | 5' TCTACAATGCCACGCTTCTG 3'  |
| PDX-1  | 5' GGTATAGCCGGAGAGATGC 3'   | 5' CTGGTCCGTATTGGAACG 3'    |
| GLUT2  | 5' CTTGGTTCATGGTTGCTGAAT 3' | 5' GCAATGTAAGGAGCAGAGG 3'   |
| GCK    | 5' ATCTTCTGTTCCACGGAGAGG 3' | 5' GATGTTAAGGATCTGCCTTCG 3' |
| STX1   | 5' ATGGAGAAGGCTGATTCCAAC 3' | 5' CCATGAGAGAAGCATGAAGGA 3' |
| SNAP25 | 5' GTGAGGAATTGGAAGACATGC 3' | 5' GCCTTGCTCTGGTACTTGACG 3' |
| VAMP2  | 5' CCCACACACCAGGTTTTCTGT 3' | 5' GCAGGGGACACTGGGATAATA 3' |
| Munc18 | 5' ATGAGGGCTGCCTATGAGGT 3'  | 5' AGCGGGTTGGAGTAAGGATGT 3' |
| Rab3a  | 5' GTTGACAGACGGCTTCTTCT 3'  | 5' AGGGAGGAGTGGGACACATTT 3' |
| SNAPTO | 5' ACCTCGTCAACTCCCTTACCA 3' | 5' GGGCCTCATCTCCTCAG A 3'   |
